# Supplementary material for: A one-pot synthesis of fluorescent N,P-codoped carbon dots for vitamin B12 determination and bioimaging application
Source: Royal Society of Chemistry journal article supplement (doi:10.1039/d0nj05597b), 2021-01-01
Supplement: d0nj05597b1.pdf [file d0nj05597b1.pdf]

## One-pot synthesis of fluorescent N,P-codoped carbon dots for vitamin B<sub>12</sub> determination and bioimaging application

Fig.S1 FL emission spectra of the CDs that were synthesized under different the molar ratio of arginine and phosphoric acid (a), reaction temperature (b) and reaction time (c).

Fig.S2 (a) The emission spectra of CDs under different excitation wavelengths ranging from 300 to 380 nm. (b) Normalized emission spectra of different excitation wavelengths.

Fig.S3. Effect of (a) pH (b) ionic strength (NaCl), (c) time, and (d) Xe lamp irradiation at room temperature on the fluorescence intensity of N,P-CDs.

Fig.S4 The absorption spectra of CDs, VB<sub>12</sub>, and their mixture

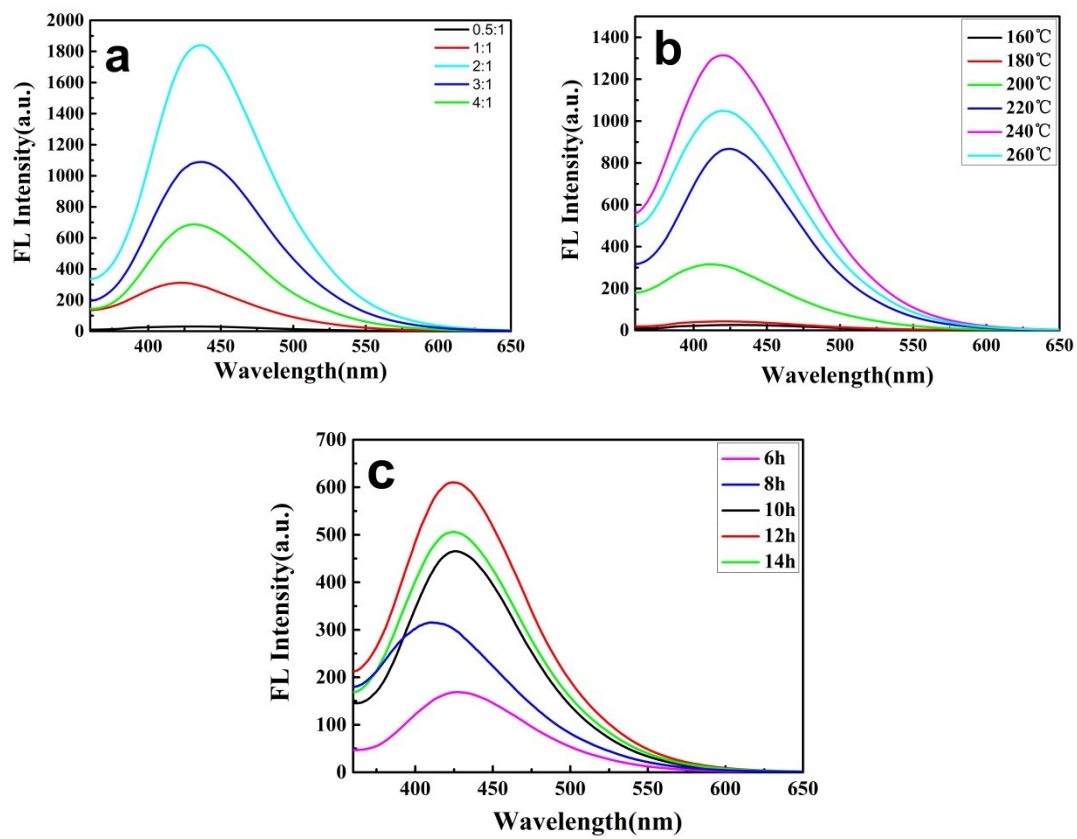

Fig. S1

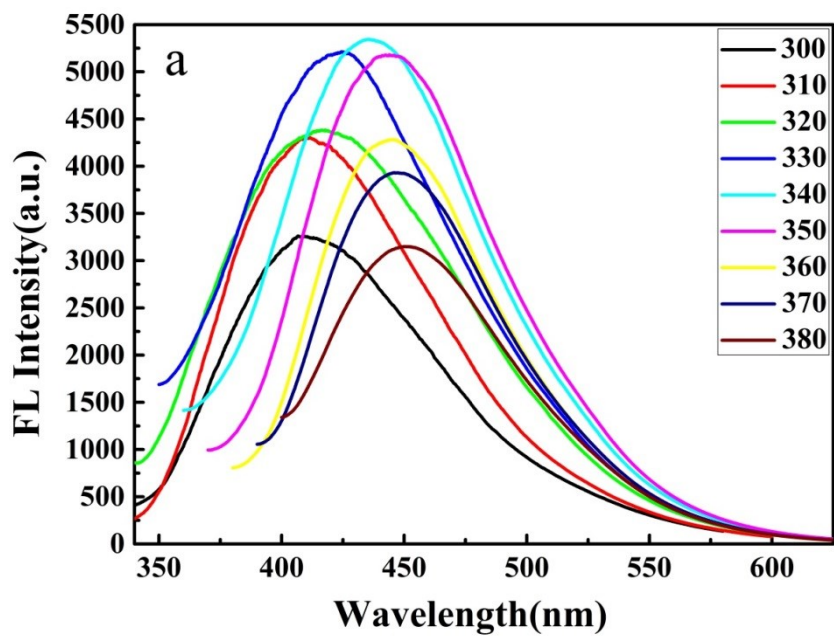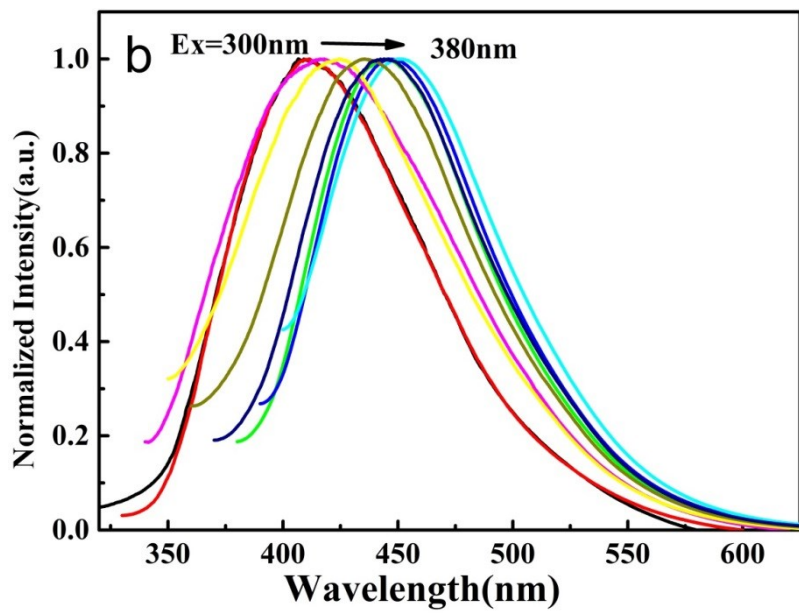

Fig.S2

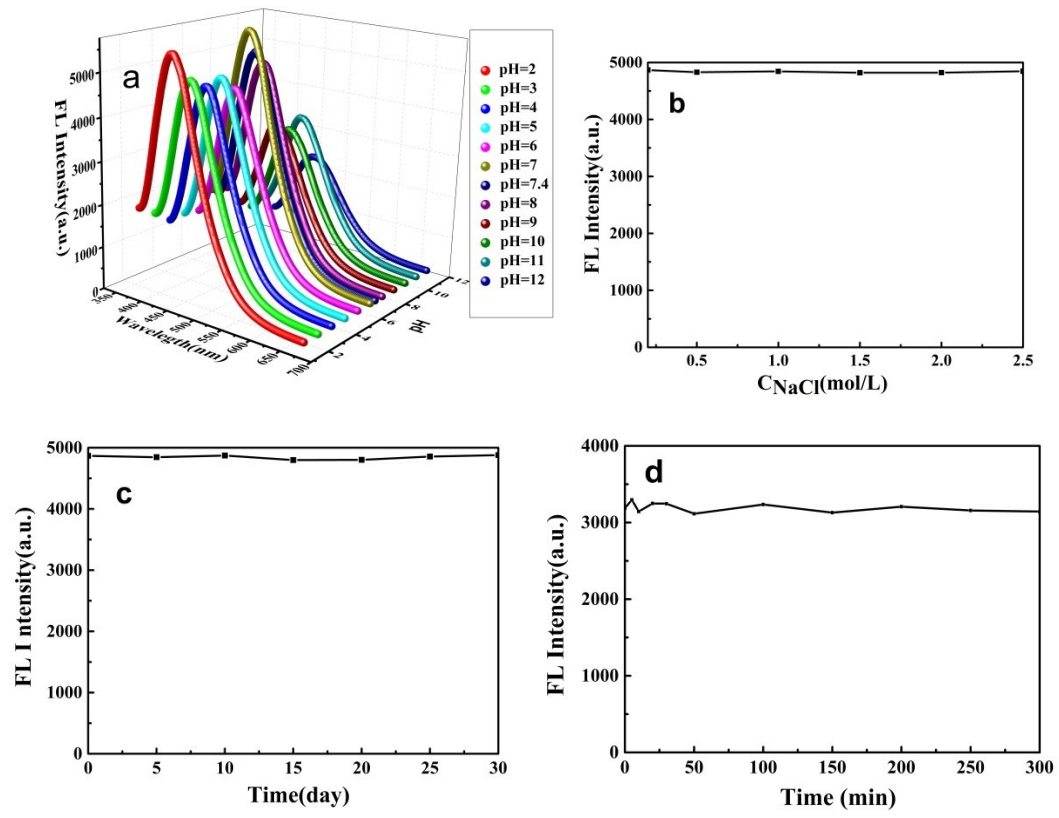

Fig.S3

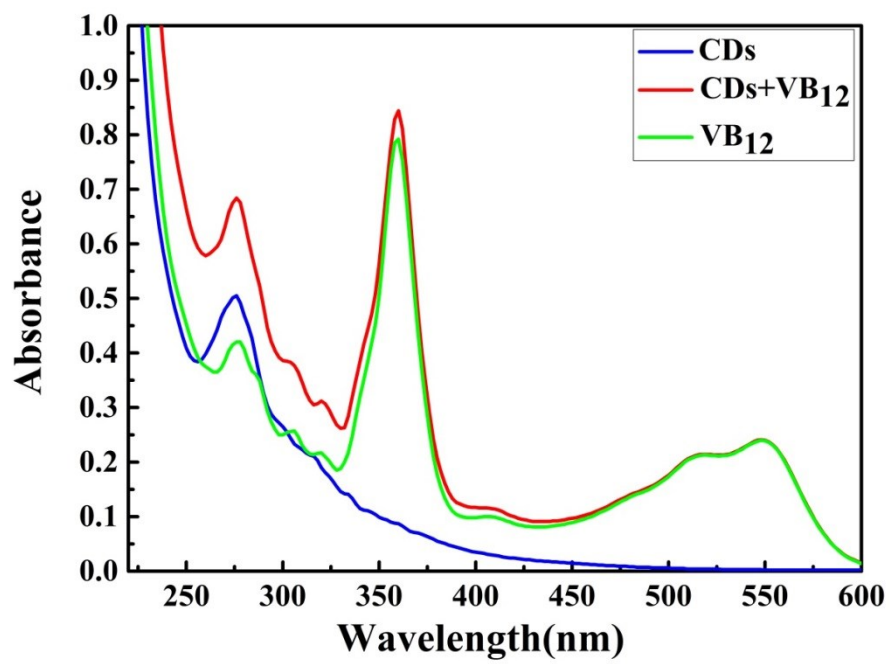

Fig.S4
